# Supplementary material for: Preparation of Specific Nanobodies and Their Application in the Rapid Detection of Nodularin-R in Water Samples
Source: MDPI journal article supplement (doi:10.3390/foods10112758), 2021-11-10
Supplement: s1 [file s1]

# Preparation of Specific Nanobodies and Their Application in the Rapid Detection of Nodularin-R in Water Samples

Jinyi Yang <sup>1,†</sup>, Rui Si <sup>1,†</sup>, Guangpei Wu <sup>1</sup>, Yu Wang <sup>2</sup>, Ruyu Fang <sup>1</sup>, Fei Liu <sup>1</sup>, Feng Wang <sup>1</sup>, Hongtao Lei <sup>1</sup>, Yudong Shen <sup>1</sup>, Qi Zhang <sup>3</sup> and Hong Wang <sup>1,\*</sup>

<sup>1</sup> Guangdong Provincial Key Laboratory of Food Quality and Safety, National-Local Joint Engineering Research Center for Processing and Safety Control of Livestock and Poultry Products, College of Food Science, South China Agricultural University, Guangzhou 510642, China; yjy361@163.com (J.Y.); huanongxiaosi@163.com (R.S.); wgphavoc@163.com (G.W.); 18819259799@163.com (R.F.); m13476079515@163.com (F.L.); wangfeng\_sp@163.com (F.W.); hongtao@scau.edu.cn (H.L.); shenyudong@scau.edu.cn (Y.S.)

<sup>2</sup> Guangzhou Institute of Food Inspection, Guangzhou 510080, China; xxwangyu@163.com

<sup>3</sup> Oil Crops Research Institute, Chinese Academy of Agricultural Sciences, Xudong 2nd Road No.2, Wuchang District, Wuhan 430062, China; zhangqi01@caas.cn

\* Correspondence: gzwhongd@163.com; Tel.: +86-20-85283448; Fax: +86-20-85280270

† These authors contribute equally to this work.

**Citation:** Yang, J.; Si, R.; Wu, G.; Wang, Y.; Fang, R.; Liu, F.; Wang, F.; Lei, H.; Shen, Y.; Zhang, Q.; et al. Preparation of Specific Nanobodies and Their Application in the Rapid Detection of Nodularin-R in Water Samples. *Foods* **2021**, *10*, 2758. <https://doi.org/foods10112758>

Academic Editor: Juliana Moura Luna

Received: 28 September 2021

Accepted: 5 November 2021

Published: 10 November 2021

**Publisher's Note:** MDPI stays neutral with regard to jurisdictional claims in published maps and institutional affiliations.

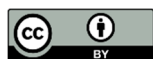

**Copyright:** © 2021 by the authors. Submitted for possible open access publication under the terms and conditions of the Creative Commons Attribution (CC BY) license (<https://creativecommons.org/licenses/by/4.0/>).

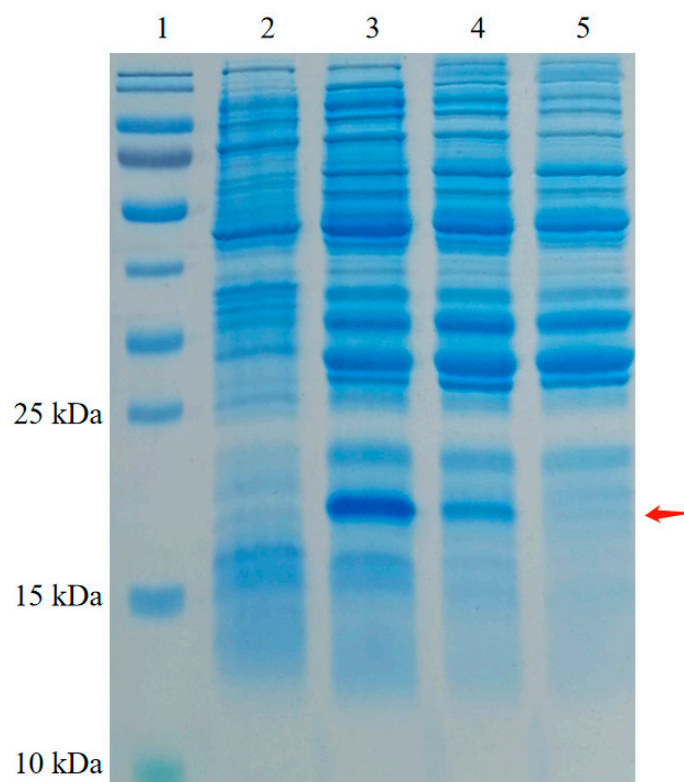

**Figure S1.** Comparison of expression levels of three nanobody (Nb-T3-15, Nb-56, Nb-3F9) by SDS-PAGE. lane 1, marker; lane 2, wild type *E.coli* BL21(DE3); lane 3, Nb-T3-15; lane 4, Nb-56; lane 5, Nb-3F9.

**Table S1.** Abbreviation list.

| Materials                                               | abbreviation                                   |
|---------------------------------------------------------|------------------------------------------------|
| Nodularins                                              | NODs (NOD-R)                                   |
| Microcystins                                            | MCs (MC-LR, -LA, -LY, -LW, -LF, -YR, -WR, -RR) |
| Nodularin-R-ovalbumin                                   | NOD-R-OVA                                      |
| Microcystin-LR-keyhole limpet hemocyanin                | MC-LR-KLH                                      |
| Anti-MC-LR monoclonal antibody                          | Anti-MC-LR MAb                                 |
| indirect competitive enzyme-linked immuno-sorbent assay | ic-ELISA                                       |
| protein phosphatases (PPs) 1 and 2A                     | PP1 and PP2A                                   |
| maximum residue limit                                   | MRL                                            |
| high performance liquid chromatography                  | HPLC                                           |
| mass spectrometry                                       | MS                                             |
| polyclonal antibodies                                   | PABs                                           |
| monoclonal antibodies                                   | MABs                                           |
| fluorescence polarization immunoassay                   | FPIA                                           |
| isopropylthio- $\beta$ -D-galactoside                   | IPTG                                           |
| limit of detection                                      | LOD                                            |
| maximal inhibitory concentration                        | IC <sub>50</sub>                               |
| cross reactivity                                        | CR                                             |

(a) 

**动物实验伦理审查结果**

编号: 2020F061

|                 |                                                                                                                                                                                       |
|-----------------|---------------------------------------------------------------------------------------------------------------------------------------------------------------------------------------|
| 课题名称            | 重要海洋生物毒素绿色免疫分析基础及智能化检测技术开发                                                                                                                                                            |
| 审查表编号           | 2020F061                                                                                                                                                                              |
| 课题负责人           | 徐振林                                                                                                                                                                                   |
| 院系部门            | 食品学院                                                                                                                                                                                  |
| 拟使用实验动物情况       | 该项目计划从广东省医学实验动物中心 (许可证号: SCXK(粤)2018-0002) 购买 SPF 及 BALB/c 小鼠 30 只, 在华南农业大学实验动物中心 (许可证号: SCXK(粤)2019-0136) 内进行实验。随机分为 10 组, 每组 3 只。4 只雌性羊驼, 南昌大佳科技有限公司提供。4 只雄性骆驼, 唐山市丰南区澳尚客骆驼养殖专业合作社。 |
| 伦理委员会审查意见       | 经初步审核, 该项目动物实验方案符合动物保护、动物福利和伦理原则。                                                                                                                                                     |
| 主任 (副主任) 委员终审意见 | 同意                                                                                                                                                                                    |
| 审核人             | 刘忠华                                                                                                                                                                                   |
| 时间              | 2020-08-05                                                                                                                                                                            |

华南农业大学实验动物伦理委员会  
2020 年 8 月 5 日

(b) 

**Result of ethical review of animal experiment**

No:2020F061

|                                                 |                                                                                                                                                                                                                                                                                                                                                                                                                                                                                                |
|-------------------------------------------------|------------------------------------------------------------------------------------------------------------------------------------------------------------------------------------------------------------------------------------------------------------------------------------------------------------------------------------------------------------------------------------------------------------------------------------------------------------------------------------------------|
| Experiment Item                                 | Development of green immunoassay basis and intelligent detection technology for important Marine biotoxins                                                                                                                                                                                                                                                                                                                                                                                     |
| protocol code                                   | 2020F061                                                                                                                                                                                                                                                                                                                                                                                                                                                                                       |
| Subject Leader                                  | Zhenlin Xu                                                                                                                                                                                                                                                                                                                                                                                                                                                                                     |
| Department                                      | College of food science                                                                                                                                                                                                                                                                                                                                                                                                                                                                        |
| The intended use of experimental animals        | This project plans to purchase 30 SPF and BALB/C mice from Guangdong Medical Experimental Animal Center (License No. : SCXK (Guangdong) 2018-0002) and conduct experiments in Experimental Animal Center of South China Agricultural University (License No. : SCXK (Guangdong) 2019-0136). They are randomly divided into 10 groups with 3 mice in each group. 4 female alpacas, provided by Nanchang Dajia Technology Co., LTD. Four male camels, Bro-shang, Fengnan District, Tangshan city |
| Comments of ethical reviewer                    | After a preliminary review, the program's animal testing program conforms to animal protection, animal welfare and ethical principles                                                                                                                                                                                                                                                                                                                                                          |
| Final comments of director (or deputy director) | Agree                                                                                                                                                                                                                                                                                                                                                                                                                                                                                          |
| Reviewer                                        | Zhonghua Liu                                                                                                                                                                                                                                                                                                                                                                                                                                                                                   |
| Review Date                                     | 2020-08-05                                                                                                                                                                                                                                                                                                                                                                                                                                                                                     |

Experimental Animal Ethics Committee of  
South China Agricultural University  
August 5th, 2020

**Figure S2.** Results of ethical review of animal experiments. (a) Original copy. (b) English translation.
